# Supplementary material for: Alternating Current Stimulation for Vision Restoration after Optic Nerve Damage: A Randomized Clinical Trial
Source: PubMed Central journal article supplement (PMC4927182; doi:10.1371/journal.pone.0156134), 2016-06-29

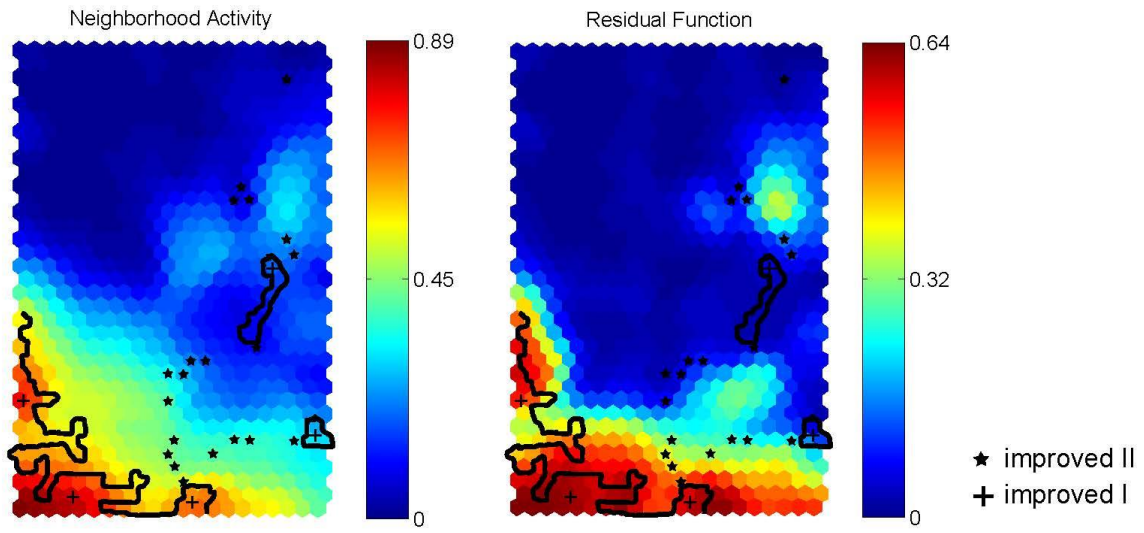

Supplement: pone.0156134.s003.pdf [file pone.0156134.s003.pdf]
